# Supplementary material for: A zero-dimensional hybrid copper(i) bromide single crystal with highly efficient green emission
Source: Royal Society of Chemistry journal article supplement (doi:10.1039/d3cp05140d), 2023-12-18
Supplement: d3cp05140d1.pdf [file d3cp05140d1.pdf]

Supporting Information

# **Zero-Dimensional Hybrid Copper(I) Bromide Single Crystal with Highly Efficient Green Emission**

*Yingui Gao<sup>a,b</sup>, Zhihuang Xu<sup>a</sup>, Liwang Ye<sup>a</sup>, Yuanjie Wang<sup>a,c</sup>, Xinxin Zhuang<sup>a,b,\*</sup>*

<sup>a</sup> Key Laboratory of Optoelectronic Materials Chemistry and Physics, Fujian Institute of Research on the Structure of Matter, Chinese Academy of Sciences, Fuzhou 350002, China.

<sup>b</sup> University of Chinese Academy of Sciences, Beijing 100049, China

<sup>c</sup> College of Chemistry and Materials Science, Fujian Normal University, Fuzhou, 350007, China

\* Corresponding author: [zxx@fjirsm.ac.cn](mailto:zxx@fjirsm.ac.cn)

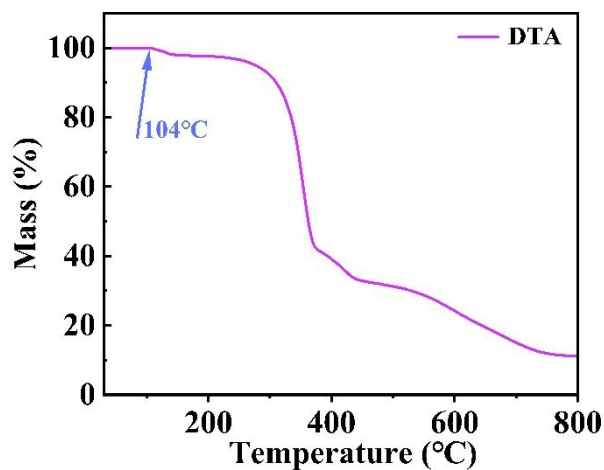

Figure S1. Thermogravimetric (TG) analysis  $(\text{AEP})_2\text{Cu}_2\text{Br}_6 \cdot 2\text{Br} \cdot 2\text{H}_2\text{O}$ .

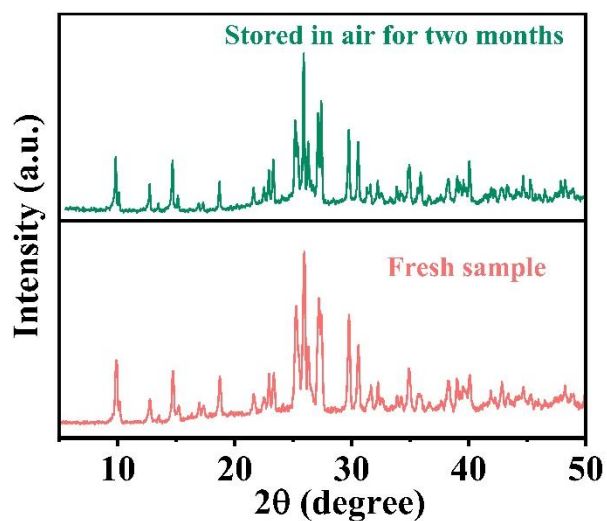

Figure S2. PXRD patterns of  $(\text{AEP})_2\text{Cu}_2\text{Br}_6 \cdot 2\text{Br} \cdot 2\text{H}_2\text{O}$  after the storage in air for two months.

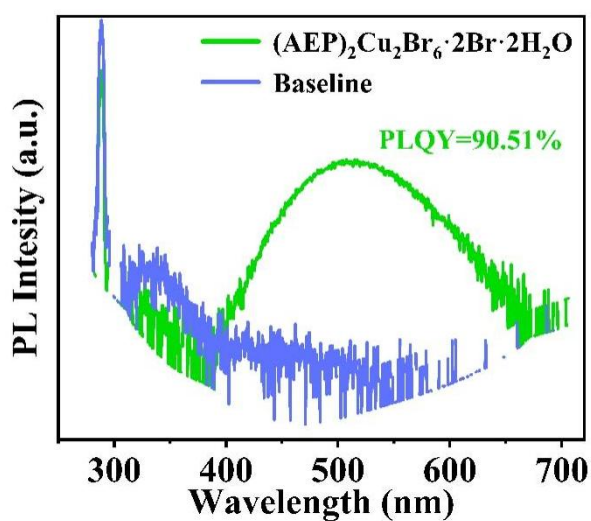

Figure S3. PLQY of  $(\text{AEP})_2\text{Cu}_2\text{Br}_6 \cdot 2\text{Br} \cdot 2\text{H}_2\text{O}$ .

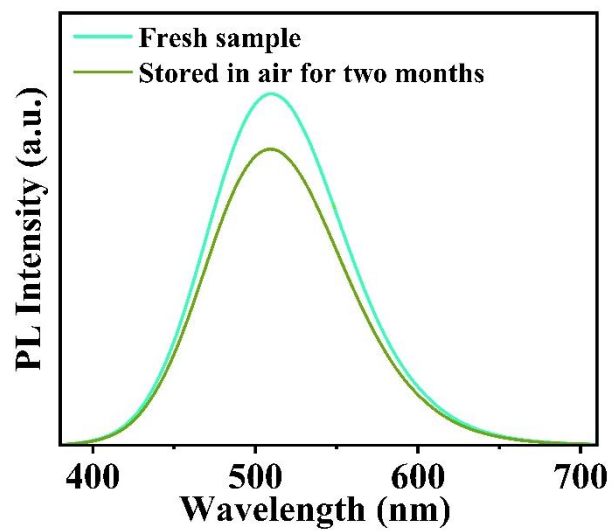

**Figure S4.** PL spectrum of  $(\text{AEP})_2\text{Cu}_2\text{Br}_6 \cdot 2\text{Br} \cdot 2\text{H}_2\text{O}$  after the storage in air for two months.

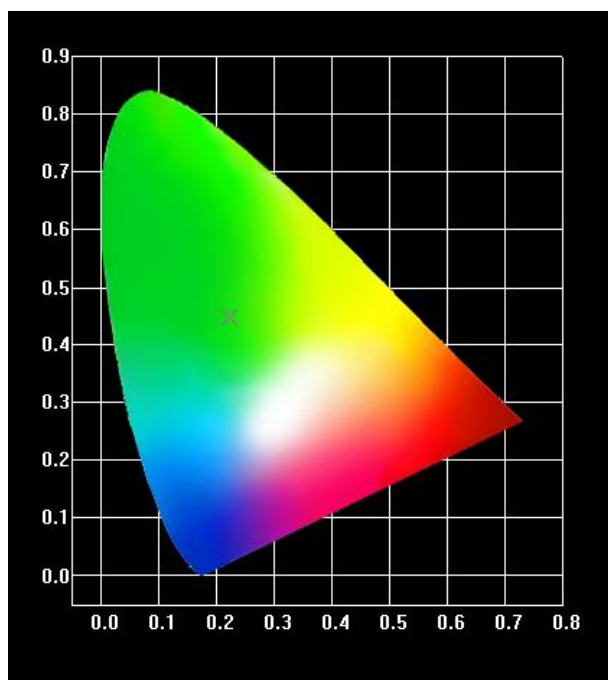

**Figure S5.** CIE chromaticity diagram of  $(\text{AEP})_2\text{Cu}_2\text{Br}_6 \cdot 2\text{Br} \cdot 2\text{H}_2\text{O}$ .

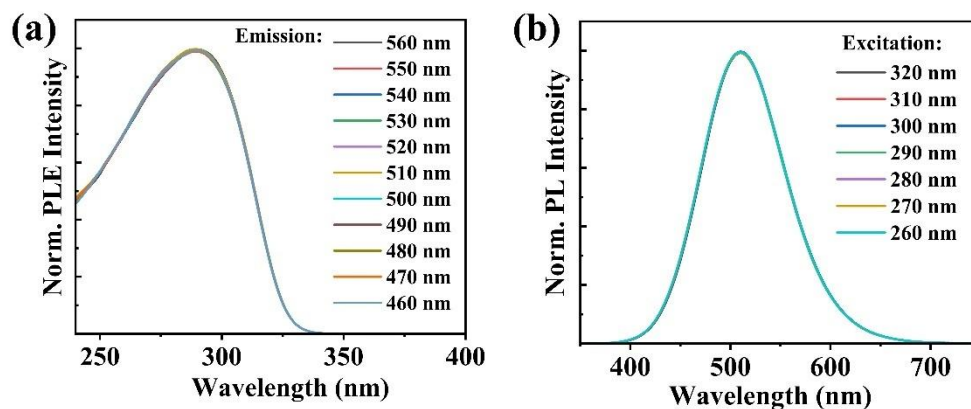

Figure S6. Wavelength-dependent PLE spectra and PL spectra.

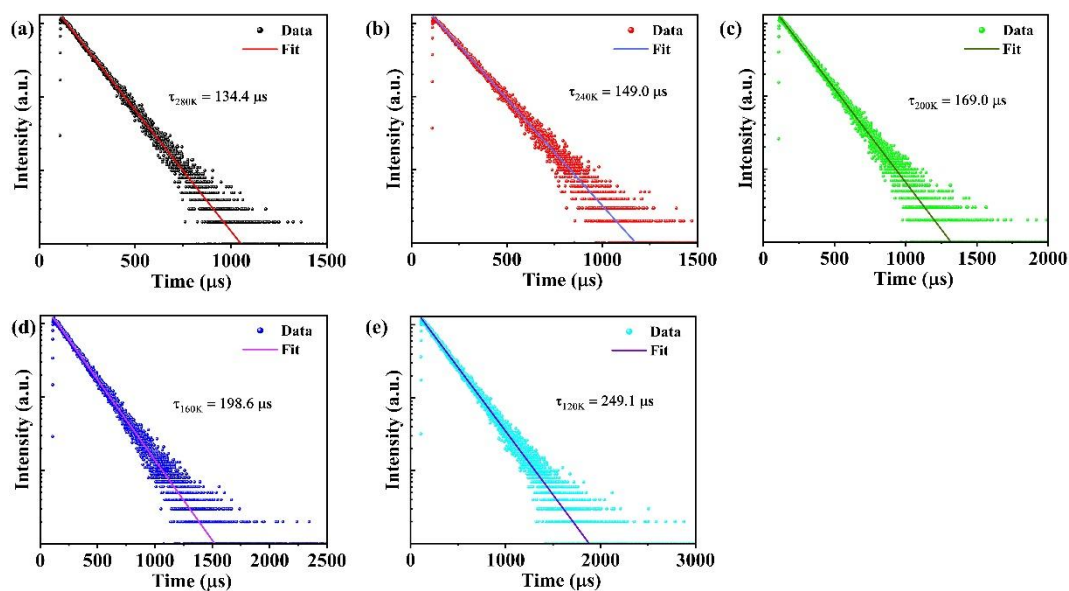

Figure S7. PL decay lifetime curves of the  $(\text{AEP})_2\text{Cu}_2\text{Br}_6 \cdot 2\text{Br} \cdot 2\text{H}_2\text{O}$  at 120-280K.

**Table S1.** Crystal data and structure refinement for (AEP)<sub>2</sub>Cu<sub>2</sub>Br<sub>6</sub>·2Br·2H<sub>2</sub>O

|                                             |                                                                                               |
|---------------------------------------------|-----------------------------------------------------------------------------------------------|
| Empirical formula                           | C <sub>12</sub> H <sub>40</sub> Br <sub>8</sub> Cu <sub>2</sub> N <sub>6</sub> O <sub>2</sub> |
| Formula weight                              | 1066.86                                                                                       |
| Temperature/K                               | 293(2)                                                                                        |
| Crystal system                              | monoclinic                                                                                    |
| Space group                                 | P2 <sub>1</sub> /c                                                                            |
| a/Å                                         | 8.85500(10)                                                                                   |
| b/Å                                         | 11.8895(2)                                                                                    |
| c/Å                                         | 14.0612(2)                                                                                    |
| α/°                                         | 90                                                                                            |
| β/°                                         | 97.6360(10)                                                                                   |
| γ/°                                         | 90                                                                                            |
| Volume/Å <sup>3</sup>                       | 1467.26(4)                                                                                    |
| Z                                           | 2                                                                                             |
| ρ <sub>calc</sub> /cm <sup>3</sup>          | 2.415                                                                                         |
| μ/mm <sup>-1</sup>                          | 14.734                                                                                        |
| F(000)                                      | 1016.0                                                                                        |
| Crystal size/mm <sup>3</sup>                | 8.855 × 14.0612 × 11.8895                                                                     |
| Radiation                                   | CuKα (λ = 1.54184)                                                                            |
| 2θ range for data collection/°              | 9.778 to 152.952                                                                              |
| Index ranges                                | -9 ≤ h ≤ 11, -14 ≤ k ≤ 14, -17 ≤ l ≤ 17                                                       |
| Reflections collected                       | 9870                                                                                          |
| Independent reflections                     | 2969 [R <sub>int</sub> = 0.0724, R <sub>sigma</sub> = 0.0529]                                 |
| Data/restraints/parameters                  | 2969/0/141                                                                                    |
| Goodness-of-fit on F <sup>2</sup>           | 1.100                                                                                         |
| Final R indexes [I ≥ 2σ (I)]                | R <sub>1</sub> = 0.0632, wR <sub>2</sub> = 0.1661                                             |
| Final R indexes [all data]                  | R <sub>1</sub> = 0.0655, wR <sub>2</sub> = 0.1769                                             |
| Largest diff. peak/hole / e Å <sup>-3</sup> | 1.54/-1.81                                                                                    |

**Table S2.** Fractional Atomic Coordinates ( $\times 10^4$ ) and Equivalent Isotropic Displacement Parameters ( $\text{\AA}^2 \times 10^3$ ) for  $(\text{AEP})_2\text{Cu}_2\text{Br}_6 \cdot 2\text{Br} \cdot 2\text{H}_2\text{O}$ .  $U_{\text{eq}}$  is defined as 1/3 of the trace of the orthogonalised  $U_{ij}$  tensor

| Atom | $x$        | $y$       | $z$       | $U(\text{eq})$ |
|------|------------|-----------|-----------|----------------|
| Br1  | 6852.8(6)  | 5144.3(4) | 6020.3(4) | 28.4(3)        |
| Br3  | 4571.9(6)  | 8003.0(4) | 4767.8(4) | 31.1(3)        |
| Br4  | 10872.4(7) | 4210.0(5) | 8919.4(4) | 38.3(3)        |
| N2   | 1827(5)    | 2981(3)   | 6977(3)   | 21.4(8)        |
| O1   | 7337(5)    | 5138(4)   | 8861(3)   | 42.2(10)       |
| N3   | 4463(5)    | 4418(4)   | 8172(3)   | 33.9(10)       |
| N1   | -754(5)    | 2570(4)   | 5508(3)   | 32.8(10)       |
| C5   | 3330(6)    | 2604(4)   | 7521(4)   | 28.4(10)       |
| C3   | 1926(6)    | 3148(4)   | 5930(3)   | 27.3(10)       |
| C1   | -883(6)    | 2411(5)   | 6550(4)   | 31.9(11)       |
| C2   | 616(6)     | 2113(4)   | 7102(4)   | 30.9(11)       |
| C6   | 4620(6)    | 3433(4)   | 7549(4)   | 29.6(10)       |
| C4   | 398(6)     | 3460(5)   | 5390(4)   | 31.3(11)       |
| Br2  | 2508.6(7)  | 6071.3(5) | 6549.3(4) | 32.7(3)        |
| Cu1  | 4398.7(11) | 6050.5(7) | 5355.5(7) | 40.7(3)        |

**Table S3.** Anisotropic Displacement Parameters ( $\text{\AA}^2 \times 10^3$ ) for  $(\text{AEP})_2\text{Cu}_2\text{Br}_6 \cdot 2\text{Br} \cdot 2\text{H}_2\text{O}$ . The Anisotropic displacement factor exponent takes the form:  $-2\pi^2[h^2a^*U_{11}+2hka^*b^*U_{12}+\dots]$

| Atom | $U_{11}$ | $U_{22}$ | $U_{33}$ | $U_{23}$  | $U_{13}$ | $U_{12}$  |
|------|----------|----------|----------|-----------|----------|-----------|
| Br1  | 38.1(4)  | 21.2(4)  | 25.5(4)  | -4.26(17) | 2.7(3)   | 0.72(19)  |
| Br3  | 37.7(4)  | 24.2(4)  | 31.1(4)  | -2.65(19) | 3.1(3)   | -1.75(19) |
| Br4  | 44.4(5)  | 40.8(4)  | 30.4(4)  | -4.8(2)   | 7.6(3)   | 4.2(2)    |
| N2   | 29.5(19) | 13.2(17) | 21(2)    | 1.2(14)   | 0.9(16)  | 0.0(14)   |
| O1   | 40(2)    | 49(3)    | 36(2)    | 0.1(19)   | 0.2(18)  | -6.4(19)  |
| N3   | 38(2)    | 25(2)    | 35(2)    | 0.5(18)   | -6(2)    | -4.0(19)  |
| N1   | 31(2)    | 42(3)    | 25(2)    | 2.1(19)   | -1.2(17) | -2.1(19)  |
| C5   | 39(2)    | 20(2)    | 26(2)    | 2.4(18)   | 1(2)     | 2(2)      |
| C3   | 39(3)    | 23(2)    | 19(2)    | 5.7(17)   | -2(2)    | -5.5(19)  |
| C1   | 30(2)    | 35(3)    | 31(3)    | 2(2)      | 7(2)     | 0(2)      |
| C2   | 41(3)    | 22(2)    | 29(3)    | 5.3(19)   | 2(2)     | -7(2)     |
| C6   | 30(2)    | 29(3)    | 30(3)    | 3(2)      | 2(2)     | -1(2)     |
| C4   | 31(2)    | 37(3)    | 25(2)    | 12(2)     | -2(2)    | 1(2)      |
| Br2  | 40.6(4)  | 36.3(4)  | 21.3(4)  | -0.23(19) | 5.1(3)   | 7.5(2)    |
| Cu1  | 48.7(6)  | 35.6(5)  | 37.8(6)  | -2.4(3)   | 5.3(4)   | 1.8(4)    |

**Table S4.** Bond Lengths for (AEP)<sub>2</sub>Cu<sub>2</sub>Br<sub>6</sub>·2Br·2H<sub>2</sub>O

| Atom | Atom             | Length/Å   | Atom | Atom | Length/Å   |
|------|------------------|------------|------|------|------------|
| Br1  | Cu1              | 2.4934(11) | N1   | C1   | 1.497(6)   |
| Br1  | Cu1 <sup>1</sup> | 2.5336(10) | N1   | C4   | 1.494(7)   |
| Br3  | Cu1              | 2.4756(10) | C5   | C6   | 1.505(7)   |
| N2   | C5               | 1.512(6)   | C3   | C4   | 1.508(7)   |
| N2   | C3               | 1.499(6)   | C1   | C2   | 1.489(7)   |
| N2   | C2               | 1.514(6)   | Br2  | Cu1  | 2.5232(11) |
| N3   | C6               | 1.480(7)   |      |      |            |

<sup>1</sup>1-X, 1-Y, 1-Z**Table S5.** Bond Angles for (AEP)<sub>2</sub>Cu<sub>2</sub>Br<sub>6</sub>·2Br·2H<sub>2</sub>O

| Atom | Atom | Atom             | Angle/°  | Atom | Atom | Atom             | Angle/°   |
|------|------|------------------|----------|------|------|------------------|-----------|
| Cu1  | Br1  | Cu1 <sup>1</sup> | 71.64(4) | N3   | C6   | C5               | 113.7(4)  |
| C5   | N2   | C2               | 109.2(4) | N1   | C4   | C3               | 110.5(4)  |
| C3   | N2   | C5               | 111.9(4) | Br1  | Cu1  | Br1 <sup>1</sup> | 108.36(4) |
| C3   | N2   | C2               | 109.8(4) | Br1  | Cu1  | Br2              | 112.14(4) |
| C4   | N1   | C1               | 109.9(4) | Br3  | Cu1  | Br1 <sup>1</sup> | 108.12(4) |
| C6   | C5   | N2               | 115.7(4) | Br3  | Cu1  | Br1              | 116.16(4) |
| N2   | C3   | C4               | 111.2(4) | Br3  | Cu1  | Br2              | 106.79(4) |
| C2   | C1   | N1               | 111.2(4) | Br2  | Cu1  | Br1 <sup>1</sup> | 104.59(4) |
| C1   | C2   | N2               | 111.9(4) |      |      |                  |           |

<sup>1</sup>1-X, 1-Y, 1-Z**Table S6.** Torsion Angles for (AEP)<sub>2</sub>Cu<sub>2</sub>Br<sub>6</sub>·2Br·2H<sub>2</sub>O

| A  | B  | C  | D  | Angle/°   | A  | B  | C  | D  | Angle/°   |
|----|----|----|----|-----------|----|----|----|----|-----------|
| N2 | C5 | C6 | N3 | 72.0(6)   | C3 | N2 | C2 | C1 | -54.6(5)  |
| N2 | C3 | C4 | N1 | -58.2(6)  | C1 | N1 | C4 | C3 | 58.3(6)   |
| N1 | C1 | C2 | N2 | 56.1(6)   | C2 | N2 | C5 | C6 | -174.2(4) |
| C5 | N2 | C3 | C4 | 176.8(4)  | C2 | N2 | C3 | C4 | 55.4(5)   |
| C5 | N2 | C2 | C1 | -177.7(4) | C4 | N1 | C1 | C2 | -57.5(6)  |
| C3 | N2 | C5 | C6 | 64.0(5)   |    |    |    |    |           |

**Table S7.** Hydrogen Atom Coordinates ( $\text{\AA}\times 10^4$ ) and Isotropic Displacement Parameters ( $\text{\AA}^2\times 10^3$ ) for  $(\text{AEP})_2\text{Cu}_2\text{Br}_6\cdot 2\text{Br}\cdot 2\text{H}_2\text{O}$

| <b>Atom</b> | <b><i>x</i></b> | <b><i>y</i></b> | <b><i>z</i></b> | <b>U(eq)</b> |
|-------------|-----------------|-----------------|-----------------|--------------|
| H2          | 1536.11         | 3695.67         | 7247.63         | 26           |
| H1E         | 7335.11         | 5222.79         | 9461.29         | 63           |
| H1F         | 8102.91         | 4746.4          | 8762.4          | 63           |
| H3A         | 3801.69         | 4901.57         | 7865.62         | 41           |
| H3B         | 5364.31         | 4750.99         | 8313.96         | 41           |
| H3C         | 4127.58         | 4192.29         | 8709.76         | 41           |
| H1A         | -474.62         | 1925.79         | 5259.67         | 39           |
| H1B         | -1654.23        | 2768.68         | 5195.21         | 39           |
| H5A         | 3174.1          | 2434.3          | 8175.17         | 34           |
| H5B         | 3633.73         | 1912.16         | 7234.04         | 34           |
| H3D         | 2286.41         | 2461.14         | 5664.1          | 33           |
| H3E         | 2655.34         | 3739.15         | 5853.73         | 33           |
| H1C         | -1258.04        | 3098.97         | 6806.62         | 38           |
| H1D         | -1611.61        | 1817.9          | 6622            | 38           |
| H2A         | 938.06          | 1386.28         | 6889.13         | 37           |
| H2B         | 506.21          | 2052.69         | 7777.3          | 37           |
| H6A         | 5567.83         | 3050.04         | 7774.93         | 36           |
| H6B         | 4682.12         | 3694.38         | 6901.81         | 36           |
| H4A         | 63.81           | 4171.16         | 5628.1          | 38           |
| H4B         | 489.76          | 3550.83         | 4714.15         | 38           |



**Table S8.** Photoluminescent Properties of Different Copper-Based Halides for Comparison

| Formula                                                                           | $\lambda_{\text{ex}}$<br>(nm) | $\lambda_{\text{em}}$<br>(nm) | PLQY<br>(%) | FWHM<br>(nm) | Stokes shift<br>(nm) | $\tau_{\text{ave}}$<br>( $\mu\text{s}$ ) | Ref.      |
|-----------------------------------------------------------------------------------|-------------------------------|-------------------------------|-------------|--------------|----------------------|------------------------------------------|-----------|
| $(\text{C}_8\text{H}_{14}\text{N}_2)\text{CuCl}_3 \cdot \text{H}_2\text{O}$       | 287                           | 532                           | 2.88        | 105          | 245                  | 18.91                                    | 1         |
| $(\text{C}_8\text{H}_{14}\text{N}_2)\text{CuCl}_3$                                | 282                           | 505                           | 3.34        | 90           | 223                  | 1.19                                     |           |
| $(\text{C}_8\text{H}_{14}\text{N}_2)\text{CuBr}_3$                                | 297                           | 515                           | 35.19       | 94           | 218                  | 16.89                                    |           |
| $(\text{C}_8\text{H}_{14}\text{N}_2)\text{CuI}_3$                                 | 308                           | 522                           | 17.81       | 106          | 214                  | 32.93                                    |           |
| $(\text{TMS})_3\text{Cu}_2\text{I}_5$                                             | 340                           | 590                           | 26.88       | 140          | 250                  | 4.59                                     | 2         |
| $[\text{BAPMA}]\text{Cu}_2\text{Br}_5$                                            | 282                           | 526                           | 53.40       | 101          | 244                  | 50.2                                     | 3         |
| $(\text{R,S-2-mpip})_2\text{Cu}_2\text{I}_6$                                      | 300                           | 530                           | 65.96       | -            | 230                  | 7.37                                     | 4         |
| $(\text{MA})_4\text{Cu}_2\text{Br}_6$                                             | 302                           | 524                           | 93          | 107          | 222                  | 120                                      | 5         |
| $(\text{AEP})_2\text{Cu}_2\text{I}_6 \cdot 2\text{I} \cdot 2\text{H}_2\text{O}$   | 300                           | 495                           | 97.2        | -            | 145                  | 3.18                                     | 6         |
| $[\text{KC}_2]_2[\text{Cu}_4\text{I}_6]$                                          | 365                           | 545                           | 97.8        | -            | 180                  | 2.68                                     | 7         |
| $\text{PDACuI}_3$                                                                 | 300                           | 438                           | 26.5        | -            | 138                  | 0.66                                     | 8         |
| $(\text{PPh}_4)_2[\text{Cu}_2\text{I}_4]$                                         | 380                           | 545                           | 10          | -            | 165                  | 1.01                                     | 9         |
| $(\text{AEP})_2\text{Cu}_2\text{Br}_6 \cdot 2\text{Br} \cdot 2\text{H}_2\text{O}$ | 290                           | 510                           | 90.51       | 96           | 220                  | 121.1                                    | This work |

## References

1. T. Zhou, Y. Wang, H. Zhang, Z. Pan, X. Ma, Y. Sun, H. Chen, L. Wang and W. Jiang, *Inorganic Chemistry* **62** (19), 7376-7384 (2023).
2. D. Banerjee, D. A. Popy, B. C. Leininger, T. D. Creason, V. N. Mapara, M. Furis, M. F. Borunda and B. Saparov, *ACS Applied Materials & Interfaces* **15** (25), 30455-30468 (2023).
3. Y.-H. Liu, N.-N. Wang, M.-P. Ren, X. Yan, Y.-F. Wu, C.-Y. Yue and X.-W. Lei, *ACS Applied Materials & Interfaces* **15** (16), 20219-20227 (2023).
4. Z. Song, Z. Jia, X. Guo, B. Yu, G. Liu, L. Meng, Y. Liu, Q. Lin and Y. Dang, *Advanced Optical Materials* **11** (8) (2023).
5. H. Peng, S. Yao, Y. Guo, R. Zhi, X. Wang, F. Ge, Y. Tian, J. Wang and B. Zou, *The Journal of Physical Chemistry Letters* **11** (12), 4703-4710 (2020).
6. J. H. Wei, Y. W. Yu, J. B. Luo, Z. Z. Zhang and D. B. Kuang, *Advanced Optical Materials* **10** (16) (2022).
7. S. Li, J. Xu, Z. Li, Z. Zeng, W. Li, M. Cui, C. Qin and Y. Du, *Chemistry of Materials* **32** (15), 6525-6531 (2020).
8. Y. Du, L. Ma, Z. Yan, J. Xiao, K. Wang, T. Lin, X. Han and D. Xia, *Inorganic Chemistry* **62** (29), 11350-11359 (2023).
9. Y. Thefioux, M. Cordier, F. Massuyeau, C. Latouche, C. Martineau-Corcios and S. Perruchas, *Inorganic Chemistry* **59** (8), 5768-5780 (2020).
